# Supplementary material
Source: HighWire-hosted journal article supplement (http://canjsurg.ca/highwire/filestream/98368/field_highwire_adjunct_files/2/CJS-019721-at-3.pdf)

DOI: 10.1503/cjs.019721

Online appendices are unedited and posted as supplied by the authors.

### Appendix 3: Sensitivity analysis with Taylor et al. outcomes censored for surgical site infections (SSI)

#### A. Total SSI

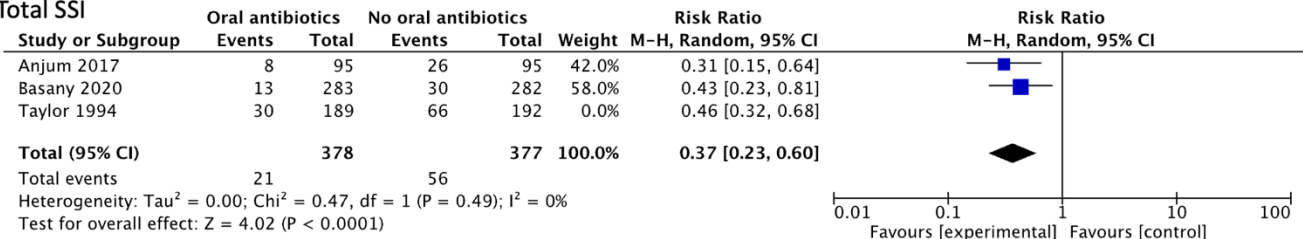

#### B. Superficial SSI

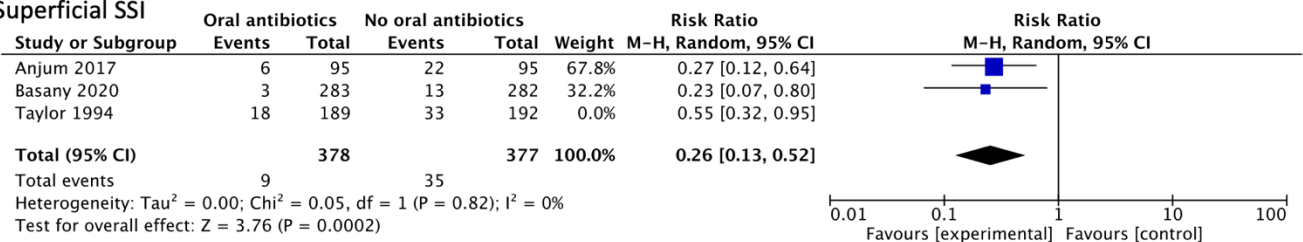

#### C. Organ/space SSI

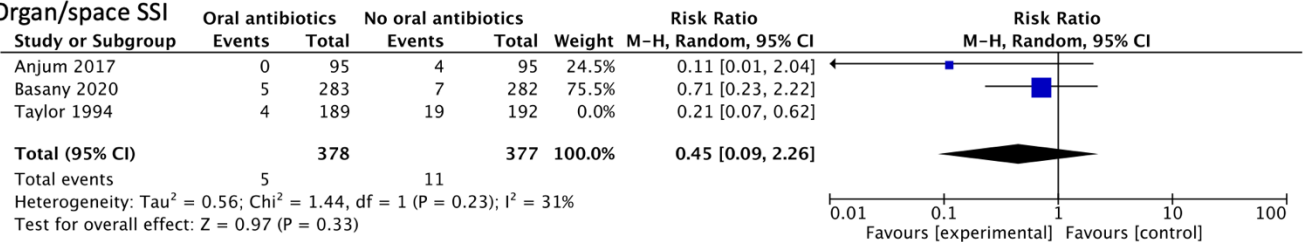

Supplement: CJS-019721-at-3.pdf [file CJS-019721-at-3.pdf]
